# Supplementary material for: Assessment of Patient Attribution to Care From Medical Oncologists, Surgeons, or Radiation Oncologists After Newly Diagnosed Cancer
Source: PubMed Central journal article supplement (PMC8111479; doi:10.1001/jamanetworkopen.2021.8055), 2021-05-10
Supplement: jamanetwopen-e218055-s001.pdf [file jamanetwopen-e218055-s001.pdf]

## SUPPLEMENTARY ONLINE CONTENT

Gondi S, Wright AA, Landrum MB, et al. Assessment of patient attribution to care from medical oncologists, surgeons, or radiation oncologists after a newly diagnosed cancer. *JAMA Netw Open*. 2021;4(5):e218055. doi:10.1001/jamanetworkopen.2021.8055

**eAppendix 1.** Study Population

**eTable 1.** CONSORT Diagram for Study Population

**eAppendix 2.** Methods for Identifying Outpatient and Inpatient Visits With Physicians and Attribution to Practices

**eTable 2.** Diagnosis Codes for Breast, Colorectal, Lung, and Prostate Cancer

**eAppendix 3.** Attribution to Medical Oncology Practices

**eAppendix 4.** Attribution to Surgery Practices

**eTable 3.** Lung Cancer Surgery Codes

**eTable 4.** Colorectal Cancer Surgery Codes

**eTable 5.** Breast Cancer Surgery Codes

**eTable 6.** Prostate Cancer Surgery Codes

**eAppendix 5.** Attribution to Radiation Oncology Practices

**eTable 7.** Radiation Delivery Codes

This supplementary material has been provided by the authors to give readers additional information about their work.

## eAppendix 1. Study Population

**eTable 1.** CONSORT Diagram for Study Population

| <b>Inclusion Criteria</b>                                                                                   | <b>Colorectal</b> | <b>Lung</b> | <b>Breast</b> | <b>Prostate</b> | <b>Total</b> |
|-------------------------------------------------------------------------------------------------------------|-------------------|-------------|---------------|-----------------|--------------|
| Patients diagnosed with cancer in 2011-2015                                                                 | 125,626           | 194,750     | 197,504       | 194,536         | 712,416      |
| Patients with non-missing month of diagnosis                                                                | 125,041           | 194,029     | 196,767       | 192,815         | 708,652      |
| Patients not identified by autopsy or death certificate                                                     | 123,586           | 189,016     | 195,674       | 191,010         | 699,286      |
| Patients with cancer stage information                                                                      | 117,708           | 181,220     | 193,162       | 182,411         | 674,501      |
| Patients who are not stage 0*                                                                               | 110,061           | 180,769     | ---           | 182,411         | 473,241      |
| Patients continuously enrolled in Parts A and B of FFS Medicare for 6 months after diagnosis or until death | 55,773            | 105,071     | 87,237        | 81,432          | 329,513      |
| Patients without end-stage renal disease                                                                    | 55,445            | 104,601     | 86,841        | 80,984          | 327,871      |
| Patients who are aged 65+                                                                                   | 51,385            | 95,635      | 79,617        | 75,571          | 302,208      |
| Patients who are female (breast)                                                                            | ---               | ---         | 78,736        | ---             | 78,736       |

\*The breast cancer cohort did not exclude stage 0 patients.

**eAppendix 2.** Methods for Identifying Outpatient and Inpatient Visits With Physicians and Attribution to Practices

We attributed patients to practices in the 6 months after diagnosis based on evaluation and management (E&M) claims for outpatient physician visits with a cancer diagnosis. Outpatient visits were identified based on Current Procedural Terminology (CPT) codes 99201-99215, 99241-99245. We required the claim to include the specific cancer diagnosis:

**eTable 2.** Diagnosis Codes for Breast, Colorectal, Lung, and Prostate Cancer

| Cancer     | Diagnosis Codes                                                                                                                                                                                      |
|------------|------------------------------------------------------------------------------------------------------------------------------------------------------------------------------------------------------|
| Breast     | Icd-9: 174xx,175xx                                                                                                                                                                                   |
|            | Icd-10: C50011,C50012,C50019,C50111,C50112,C50119,C50211,C50212,C50219,C50311,C50312,C50319,C50411,C50412,C50419,C50511,C50512,C50519,C50611,C50612,C50619,C50811,C50812,C50819,C50911,C50912,C50919 |
|            | C50021,C50022,C50029,C50121,C50122,C50129,C50221,C50222,C50229,C50321,C50322,C50329,C50421,C50422,C50429,C50521,C50522,C50529,C50621,C50622,C50629,C50821,C50822,C50829,C50921,C50922,C50929         |
|            |                                                                                                                                                                                                      |
|            |                                                                                                                                                                                                      |
|            |                                                                                                                                                                                                      |
|            |                                                                                                                                                                                                      |
| Colorectal | Icd-9: 153xx 154xx                                                                                                                                                                                   |
|            | Icd-10: C180-C20x                                                                                                                                                                                    |
| Lung       | Icd-9: 162xx                                                                                                                                                                                         |
|            | Icd-10: C3400 ,C3401 ,C3402 ,C3410 ,C3411 ,C3412 ,C342 ,C3430 ,C3431 ,C3432 ,C3480 ,C3481 ,C3482 ,C3490 ,C3491 ,C3492                                                                                |
| Prostate   | Icd-9: 185xx                                                                                                                                                                                         |
|            | Icd-10: C61xx                                                                                                                                                                                        |

Patients were assigned to the practice (based on Tax Identification Number) with the most E&M cancer-related visits; if there was a tie, we assigned patients to the practice with the most recent visit. We included all practices who were providing cancer-related care (including care by surgeons, radiation oncologists, medical oncologists, urologists, internists, etc.).

In addition, we tested the inclusion of inpatient E&M claims with a cancer diagnosis. Inpatient physician visits were identified based on CPT codes 99217-99226, 99231-99236, 99238-99239, 99251-99255, 99281-99285.

The following sections describe attribution to medical oncology, surgery, and radiation oncology practices specifically. Note that there are several possibilities for why a patient may not be attributed with our methods, including they did not seek treatment, were diagnosed by a primary care physician but did not seek follow-up, only saw non-oncologists for cancer care, or saw oncologists who billed under a non-oncology specialty code like “internal medicine.”

### **eAppendix 3.** Attribution to Medical Oncology Practices

Identification of visits to a “medical oncology practice” was based on E&M visit code with a CMS specialty code of medical oncology (83), hematology/oncology (90), hematology (82), or gynecologic oncology (98). These are the specialties that typically provide chemotherapy to patients.

## eAppendix 4. Attribution to Surgery Practices

For attribution to surgical practices, we identified patients with claims in the carrier file for surgeries of interest during the month of diagnosis through 6 months after diagnosis and identified the TIN on the surgery claim. If patients had more than one claim for a surgery, we selected the claim for the surgery with the largest allowed amount. If patients had two of the same surgical procedure, we selected the claim for the most recent surgery. Surgeries included are listed below by cancer type. Note that for TIN assignment, we focused on the carrier claims (and associated HCPCS codes) so that we could attribute to a TIN.

If patients did not have a claim for a cancer directed surgery, we identified if they had an E&M visit to a surgery practice using CMS specialty codes of general surgery (02) or surgical oncology (91) (for colorectal cancer, we also included colorectal surgery (28); for lung cancer, we also included thoracic surgery (78) and cardiac surgery (33); for prostate cancer we also included urology (34).

### Procedure codes by cancer type

eTable 3. Lung Cancer Surgery Codes

|                                                 |
|-------------------------------------------------|
| <b>Procedure - Pneumonectomy</b>                |
| <b>CPT</b>                                      |
| 32440                                           |
| 32442                                           |
| 32445                                           |
| <b>ICD-9</b>                                    |
| 32.50                                           |
| 32.59                                           |
| <b>Procedure - Lobectomy</b>                    |
| <b>CPT</b>                                      |
| 32480                                           |
| 32482                                           |
| 32484                                           |
| 32486                                           |
| 32663                                           |
| <b>ICD-9</b>                                    |
| 32.41                                           |
| 32.49                                           |
| 32.6                                            |
| <b>Procedure - Wedge or Segmental Resection</b> |
| <b>CPT</b>                                      |
| 32500                                           |
| 32505                                           |
| 32506                                           |
| 32507                                           |
| 32657                                           |

|              |
|--------------|
| 32666        |
| 32667        |
| 32668        |
| <b>ICD-9</b> |
| 32.30        |
| 32.39        |

**eTable 4.** Colorectal Cancer Surgery Codes

| <b>CPT Codes</b> | <b>Definition</b>                                                                                                                                                                                       | <b>Resection Type</b> |
|------------------|---------------------------------------------------------------------------------------------------------------------------------------------------------------------------------------------------------|-----------------------|
| 44140            | Colectomy, partial; with anastomosis                                                                                                                                                                    | Colon                 |
| 44141            | Colectomy, partial; with skin level cecostomy or colostomy                                                                                                                                              | Colon                 |
| 44143            | Colectomy, partial; with end colostomy and closure of distal segment (Hartmann type procedure)                                                                                                          | Colon                 |
| 44144            | Colectomy, partial; with resection, with colostomy or ileostomy and creation of mucofistula                                                                                                             | Colon                 |
| 44145            | Colectomy, partial; with coloproctostomy (low pelvic anastomosis)                                                                                                                                       | Colon                 |
| 44146            | Colectomy, partial; with coloproctostomy (low pelvic anastomosis), with colostomy                                                                                                                       | Colon                 |
| 44147            | Colectomy, partial; abdominal and transanal approach                                                                                                                                                    | Colon                 |
| 44150            | Colectomy, total, abdominal, without proctectomy; with ileostomy or ileoproctostomy                                                                                                                     | Colon                 |
| 44151            | Colectomy, total, abdominal, without proctectomy; with continent ileostomy                                                                                                                              | Colon                 |
| 44155            | Colectomy, total, abdominal, with proctectomy; with ileostomy                                                                                                                                           | colon+rectum          |
| 44156            | Colectomy, total, abdominal, with proctectomy; with continent ileostomy                                                                                                                                 | colon+rectum          |
| 44157            | Colectomy, total, abdominal, with proctectomy; with ileoanal anastomosis, includes loop ileostomy, and rectal mucosectomy, when performed                                                               | colon+rectum          |
| 44158            | Colectomy, total, abdominal, with proctectomy; with ileoanal anastomosis, creation of ileal reservoir (S or J), includes loop ileostomy, and rectal mucosectomy, when performed                         | colon+rectum          |
| 44160            | Colectomy, partial, with removal of terminal ileum with ileocolostomy                                                                                                                                   | Colon                 |
| 44204            | Laparoscopy, surgical; colectomy, partial, with anastomosis                                                                                                                                             | Colon                 |
| 44205            | Laparoscopy, surgical; colectomy, partial, with removal of terminal ileum with ileocolostomy                                                                                                            | Colon                 |
| 44206            | Laparoscopy, surgical; colectomy, partial, with end colostomy and closure of distal segment (Hartmann type procedure)                                                                                   | Colon                 |
| 44207            | Laparoscopy, surgical; colectomy, partial, with anastomosis, with coloproctostomy (low pelvic anastomosis)                                                                                              | Colon                 |
| 44208            | Laparoscopy, surgical; colectomy, partial, with anastomosis, with coloproctostomy (low pelvic anastomosis) with colostomy                                                                               | Colon                 |
| 44210            | Laparoscopy, surgical; colectomy, total, abdominal, without proctectomy, with ileostomy or ileoproctostomy                                                                                              | Colon                 |
| 44211            | Laparoscopy, surgical; colectomy, total, abdominal, with proctectomy, with ileoanal anastomosis, creation of ileal reservoir (S or J), with loop ileostomy, includes rectal mucosectomy, when performed | colon+rectum          |
| 44212            | Laparoscopy, surgical; colectomy, total, abdominal, with proctectomy, with ileostomy                                                                                                                    | colon+rectum          |
| 44213            | Laparoscopy, surgical, mobilization (take-down) of splenic flexure performed in conjunction with partial colectomy (List separately in addition to primary procedure)                                   | Colon                 |
| 45110            | Proctectomy; complete, combined abdominoperineal, with colostomy                                                                                                                                        | Rectal                |
| 45111            | Proctectomy; partial resection of rectum, transabdominal approach                                                                                                                                       | Rectal                |

|       |                                                                                                                                                                                                                                                                                               |              |
|-------|-----------------------------------------------------------------------------------------------------------------------------------------------------------------------------------------------------------------------------------------------------------------------------------------------|--------------|
| 45112 | Proctectomy, combined abdominoperineal, pull-through procedure (eg, colo-anal anastomosis)                                                                                                                                                                                                    | Rectal       |
| 45113 | Proctectomy, partial, with rectal mucosectomy, ileoanal anastomosis, creation of ileal reservoir (S or J), with or without loop ileostomy                                                                                                                                                     | Rectal       |
| 45114 | Proctectomy, partial, with anastomosis; abdominal and transsacral approach                                                                                                                                                                                                                    | Rectal       |
| 45116 | Proctectomy, partial, with anastomosis; transsacral approach only (Kraske type)                                                                                                                                                                                                               | Rectal       |
| 45119 | Proctectomy, combined abdominoperineal pull-through procedure (eg, colo-anal anastomosis), with creation of colonic reservoir (eg, J-pouch), with diverting enterostomy when performed                                                                                                        | Rectal       |
| 45120 | Proctectomy, complete (for congenital megacolon), abdominal and perineal approach; with pull-through procedure and anastomosis (eg, Swenson, Duhamel, or Soave type operation)                                                                                                                | Rectal       |
| 45121 | Proctectomy, complete (for congenital megacolon), abdominal and perineal approach; with subtotal or total colectomy, with multiple biopsies                                                                                                                                                   | colon+rectum |
| 45123 | Proctectomy, partial, without anastomosis, perineal approach                                                                                                                                                                                                                                  | Rectal       |
| 45126 | Pelvic exenteration for colorectal malignancy, with proctectomy (with or without colostomy), with removal of bladder and ureteral transplantations, and/or hysterectomy, or cervicectomy, with or without removal of tube(s), with or without removal of ovary(s), or any combination thereof | Rectal       |

Note: did not add/include: 44227: Laparoscopy, surgical, closure of enterostomy, large or small intestine, with resection and anastomosis; 44238: Unlisted laparoscopy procedure, intestine (except rectum)



**eTable 5.** Breast Cancer Surgery Codes

| <b>Lumpectomy</b>  |                                                                                                                                                                                                                                             |
|--------------------|---------------------------------------------------------------------------------------------------------------------------------------------------------------------------------------------------------------------------------------------|
| <b>CPT Codes</b>   | <b>Description</b>                                                                                                                                                                                                                          |
| 19120              | Excision of cyst, fibroadenoma, or other benign or malignant tumor, aberrant breast tissue, duct lesion, nipple or areolar lesion (except 19300), open, male or female, 1 or more lesions                                                   |
| 19125              | Excision of breast lesion identified by preoperative placement of radiological marker, open; single lesion                                                                                                                                  |
| 19126              | Excision of breast lesion identified by preoperative placement of radiological marker, open; each additional lesion separately identified by a preoperative radiological marker (List separately in addition to code for primary procedure) |
| 19160              | Mastectomy, partial (eg, lumpectomy, tylectomy, quadrantectomy, segmentectomy);                                                                                                                                                             |
| 19162              | Mastectomy, partial (eg, lumpectomy, tylectomy, quadrantectomy, segmentectomy); with axillary lymphadenectomy                                                                                                                               |
| 19301              | Mastectomy, partial (eg, lumpectomy, tylectomy, quadrantectomy, segmentectomy);                                                                                                                                                             |
| 19302              | Mastectomy, partial (eg, lumpectomy, tylectomy, quadrantectomy, segmentectomy); with axillary lymphadenectomy                                                                                                                               |
| <b>ICD-9 Codes</b> | <b>Description</b>                                                                                                                                                                                                                          |
| 85.21              | Local excision of lesion of breast                                                                                                                                                                                                          |
| 85.22              | Resection of quadrant of breast                                                                                                                                                                                                             |
| 85.23              | Subtotal mastectomy                                                                                                                                                                                                                         |
| <b>Mastectomy</b>  |                                                                                                                                                                                                                                             |
| <b>CPT Codes</b>   | <b>Description</b>                                                                                                                                                                                                                          |
| 19180              | Mastectomy, simple, complete                                                                                                                                                                                                                |
| 19182              | Mastectomy, subcutaneous                                                                                                                                                                                                                    |
| 19200              | Mastectomy, radical, including pectoral muscles, axillary lymph nodes                                                                                                                                                                       |
| 19220              | Mastectomy, radical, including pectoral muscles, axillary and internal mammary lymph nodes (Urban type operation)                                                                                                                           |
| 19240              | Mastectomy, modified radical, including axillary lymph nodes, with or without pectoralis minor muscle, but excluding pectoralis major muscle                                                                                                |
| 19303              | Mastectomy, simple, complete                                                                                                                                                                                                                |
| 19304              | Mastectomy, subcutaneous                                                                                                                                                                                                                    |
| 19305              | Mastectomy, radical, including pectoral muscles, axillary lymph nodes                                                                                                                                                                       |
| 19306              | Mastectomy, radical, including pectoral muscles, axillary and internal mammary lymph nodes (Urban type operation)                                                                                                                           |
| 19307              | Mastectomy, modified radical, including axillary lymph nodes, with or without pectoralis minor muscle, but excluding pectoralis major muscle                                                                                                |
| <b>ICD-9 Codes</b> | <b>Description</b>                                                                                                                                                                                                                          |
| 85.41              | Unilateral simple mastectomy                                                                                                                                                                                                                |
| 85.42              | Bilateral simple mastectomy                                                                                                                                                                                                                 |
| 85.43              | Unilateral extended simple mastectomy                                                                                                                                                                                                       |
| 85.44              | Bilateral extended simple mastectomy                                                                                                                                                                                                        |

|       |                                        |
|-------|----------------------------------------|
| 85.45 | Unilateral radical mastectomy          |
| 85.46 | Bilateral radical mastectomy           |
| 85.47 | Unilateral extended radical mastectomy |
| 85.48 | Bilateral extended radical mastectomy  |

**eTable 6. Prostate Cancer Surgery Codes**

| <b>Prostatectomy</b>   |                                                                                                                                                                     |
|------------------------|---------------------------------------------------------------------------------------------------------------------------------------------------------------------|
| <b>CPT</b>             | <b>Definition</b>                                                                                                                                                   |
| 55810                  | Prostatectomy, perineal radical;                                                                                                                                    |
| 55812                  | Prostatectomy, perineal radical; with lymph node biopsy(s) (limited pelvic lymphadenectomy)                                                                         |
| 55815                  | Prostatectomy, perineal radical; with bilateral pelvic lymphadenectomy, including external iliac, hypogastric and obturator nodes                                   |
| 55840                  | Prostatectomy, retropubic radical, with or without nerve sparing;                                                                                                   |
| 55842                  | Prostatectomy, retropubic radical, with or without nerve sparing; with lymph node biopsy(s) (limited pelvic lymphadenectomy)                                        |
| 55845                  | Prostatectomy, retropubic radical, with or without nerve sparing; with bilateral pelvic lymphadenectomy, including external iliac, hypogastric, and obturator nodes |
| 55866                  | Laparoscopy, surgical prostatectomy, retropubic radical, including nerve sparing, includes robotic assistance, when performed                                       |
| <b>ICD-9 Procedure</b> |                                                                                                                                                                     |
| 60.5                   | Radical prostatectomy                                                                                                                                               |

## eAppendix 5. Attribution to Radiation Oncology Practices

For attribution to radiation oncology practices, we identified patients with claims in the carrier file for receipt of radiation therapy during the month of diagnosis through 6 months after diagnosis and identified the TIN on the first radiation claim. Radiation codes included are listed below.

If patients did not have a claim for radiation delivery, we identified if they had an E&M visit to a radiation oncologist using CMS specialty codes of for radiation oncology (92).

**eTable 7.** Radiation Delivery Codes

| Code Type | CPT   | Definition                                                                                                                                                                                             |
|-----------|-------|--------------------------------------------------------------------------------------------------------------------------------------------------------------------------------------------------------|
| CPT       | 77402 | Radiation treatment delivery, =>1 MeV; simple                                                                                                                                                          |
| CPT       | 77403 | Radiation treatment delivery, single treatment area, single port or parallel opposed ports, simple blocks or no blocks; 6-10 MeV                                                                       |
| CPT       | 77404 | Radiation treatment delivery, single treatment area, single port or parallel opposed ports, simple blocks or no blocks; 11-19 MeV                                                                      |
| CPT       | 77406 | Radiation treatment delivery, single treatment area, single port or parallel opposed ports, simple blocks or no blocks; 20 MeV or greater                                                              |
| CPT       | 77407 | Radiation treatment delivery, =>1 MeV; intermediate                                                                                                                                                    |
| CPT       | 77408 | Radiation treatment delivery, 2 separate treatment areas, 3 or more ports on a single treatment area, use of multiple blocks; 6-10 MeV                                                                 |
| CPT       | 77409 | Radiation treatment delivery, 2 separate treatment areas, 3 or more ports on a single treatment area, use of multiple blocks; 11-19 MeV                                                                |
| CPT       | 77411 | Radiation treatment delivery, 2 separate treatment areas, 3 or more ports on a single treatment area, use of multiple blocks; 20 MeV or greater                                                        |
| CPT       | 77412 | Radiation treatment delivery, =>1 MeV; complex                                                                                                                                                         |
| CPT       | 77413 | Radiation treatment delivery, 3 or more separate treatment areas, custom blocking, tangential ports, wedges, rotational beam, compensators, electron beam; 6-10 MeV                                    |
| CPT       | 77414 | Radiation treatment delivery, 3 or more separate treatment areas, custom blocking, tangential ports, wedges, rotational beam, compensators, electron beam; 11-19 MeV                                   |
| CPT       | 77416 | Radiation treatment delivery, 3 or more separate treatment areas, custom blocking, tangential ports, wedges, rotational beam, compensators, electron beam; 20 MeV or greater                           |
| CPT       | 77418 | Intensity modulated treatment delivery, single or multiple fields/arcs, via narrow spatially and temporally modulated beams, binary, dynamic MLC, per treatment session                                |
| CPT       | 77522 | Proton treatment delivery; simple, with compensation                                                                                                                                                   |
| CPT       | 77523 | Proton treatment delivery; intermediate                                                                                                                                                                |
| CPT       | 77525 | Proton treatment delivery; complex                                                                                                                                                                     |
| CPT       | 0073T | Compensator-based beam modulation treatment delivery of inverse planned treatment using 3 or more high resolution (milled or cast) compensator convergent beam modulated fields, per treatment session |
| CPT       | 77385 | Intensity modulated radiation treatment delivery (IMRT), includes guidance and tracking, when performed; simple                                                                                        |

|       |       |                                                                                                                                                                                                         |
|-------|-------|---------------------------------------------------------------------------------------------------------------------------------------------------------------------------------------------------------|
| HCPCS | G6003 | Radiation treatment delivery, single treatment area, single port or parallel opposed ports, simple blocks or no blocks: up to 5 mev                                                                     |
| HCPCS | G6004 | Radiation treatment delivery, single treatment area, single port or parallel opposed ports, simple blocks or no blocks: 6-10 mev                                                                        |
| HCPCS | G6005 | Radiation treatment delivery, single treatment area, single port or parallel opposed ports, simple blocks or no blocks: 11-19 mev                                                                       |
| HCPCS | G6006 | Radiation treatment delivery, single treatment area, single port or parallel opposed ports, simple blocks or no blocks: 20 mev or greater                                                               |
| HCPCS | G6007 | Radiation treatment delivery, 2 separate treatment areas, 3 or more ports on a single treatment area, use of multiple blocks: up to 5 mev                                                               |
| HCPCS | G6008 | Radiation treatment delivery, 2 separate treatment areas, 3 or more ports on a single treatment area, use of multiple blocks: 6-10 mev                                                                  |
| HCPCS | G6009 | Radiation treatment delivery, 2 separate treatment areas, 3 or more ports on a single treatment area, use of multiple blocks: 11-19 mev                                                                 |
| HCPCS | G6010 | Radiation treatment delivery, 2 separate treatment areas, 3 or more ports on a single treatment area, use of multiple blocks: 20 mev or greater                                                         |
| HCPCS | G6011 | Radiation treatment delivery, 3 or more separate treatment areas, custom blocking, tangential ports, wedges, rotational beam, compensators, electron beam; up to 5 mev                                  |
| HCPCS | G6012 | Radiation treatment delivery, 3 or more separate treatment areas, custom blocking, tangential ports, wedges, rotational beam, compensators, electron beam; 6-10 mev                                     |
| HCPCS | G6013 | Radiation treatment delivery, 3 or more separate treatment areas, custom blocking, tangential ports, wedges, rotational beam, compensators, electron beam; 11-19 mev                                    |
| HCPCS | G6014 | Radiation treatment delivery, 3 or more separate treatment areas, custom blocking, tangential ports, wedges, rotational beam, compensators, electron beam; 20 mev or greater                            |
| HCPCS | G6015 | Intensity modulated treatment delivery, single or multiple fields/arcs, via narrow spatially and temporally modulated beams, binary, dynamic MLC, per treatment session                                 |
| HCPCS | G6016 | Compensator-based beam modulation treatment delivery of inverse planned treatment using 3 or more high resolution (milled or cast) compensator, convergent beam modulated fields, per treatment session |
